# Supplementary material
Source: publisher figshare collection journal article supplement (https://acs.figshare.com/ndownloader/files/23627307)
Supplement: Supplementary file 1 [file 23627307]

## Supporting Information

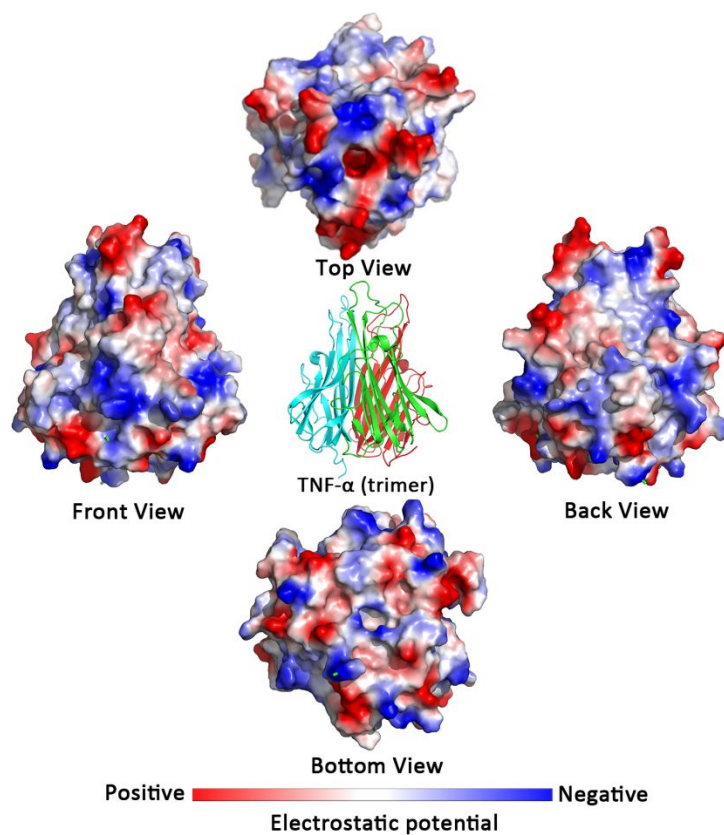

**Fig. S1** Electrostatic surface potential of TNF- $\alpha$  at different views (pH 7.4).

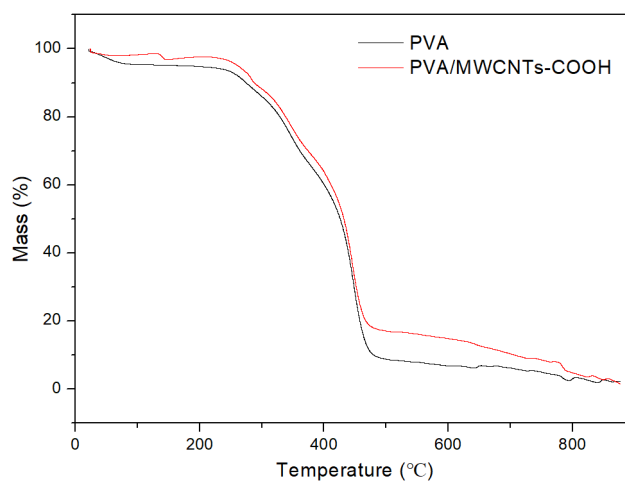

**Fig. S2** Thermogravimetric analysis (TGA) of hybrid material

**Table S1** Surface area, pore volume and pore size of PVA and PVA/MWCNTs-COOH as determined by nitrogen sorption method.

|                 | Specific surface<br>area (m <sup>2</sup> /g) | Pore volume<br>(cm <sup>3</sup> /g) | Mean pore size (nm) |
|-----------------|----------------------------------------------|-------------------------------------|---------------------|
| PVA             | 24                                           | 0.053                               | 9.09                |
| PVA/MWCNTs-COOH | 27                                           | 0.071                               | 10.65               |

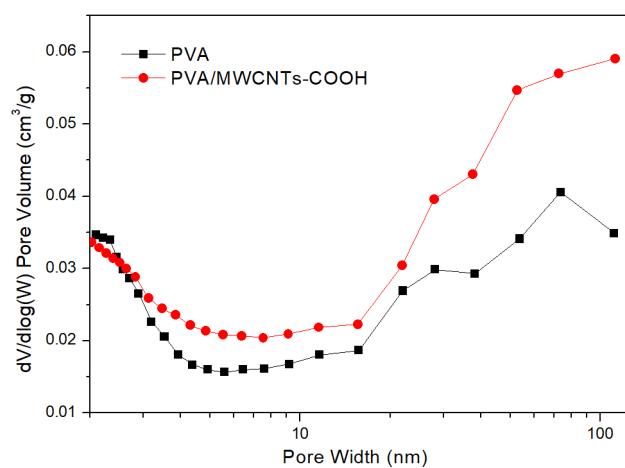

**Fig. S3** BJH pore-size distribution as determined by nitrogen sorption method
